# Supplementary material
Source: PubMed Central journal article supplement (PMC4976228)
Supplement: Supp_Table1.pdf [file Supp_Table1.pdf]

SUPPLEMENTARY TABLE S1. FORWARD (SENSE)  
AND REVERSE (ANTI-SENSE) PRIMERS FOR THE REVERSE  
TRANSCRIPTION POLYMERASE CHAIN REACTION TEST

| <i>Gene</i>             | <i>Direction</i> | <i>Sequence 5'-3'</i>         |
|-------------------------|------------------|-------------------------------|
| <i>PTCSC2-spliced</i>   | Forward          | cca gga tga tgg cct gtg       |
|                         | Reverse          | aat ccc ctg cag ttt cct gat t |
| <i>PTCSC2-unspliced</i> | Forward          | tgg tga tgg tat ggt cat gg    |
|                         | Reverse          | ccc agg ctc agg tta tgt ct    |
| <i>PTCSC3</i>           | Forward          | tca aac tcc agg gct tga ac    |
|                         | Reverse          | att acg gct ggg tct acc t     |
| <i>TSHR</i>             | Forward          | ccc agt acg cag act ctg aa    |
|                         | Reverse          | cca gtg ttg aaa atg cca ag    |
| <i>FOXE1</i>            | Forward          | tga cct ggg ctg gtt ttc c     |
|                         | Reverse          | tgc tga cgc aca gtt caa ctc   |
| <i>PAX8</i>             | Forward          | cct ttg tga atg gca gac ct    |
|                         | Reverse          | tag gga ggt tga atg gtt gc    |
| <i>NKX2-1</i>           | Forward          | cca tga gga aca gcg cct c     |
|                         | Reverse          | ctc acg tcc ccc agc ga        |
| <i>TPO</i>              | Forward          | cgg gtc atc tgt gac aac ac    |
|                         | Reverse          | cgg agt cta cgc agg ttc tc    |
| <i>NIS</i>              | Forward          | ctc cct gct aac gac tcc ag    |
|                         | Reverse          | gac cac cat cat gtc caa ca    |
| <i>TG</i>               | Forward          | cca aga aaa ccc atc tcc aa    |
|                         | Reverse          | att gtt cca cca acc acc tc    |
| <i>GAPDH</i>            | Forward          | cac caa ctg ctt agc acc cc    |
|                         | Reverse          | tct tct ggg tgg cag tga tg    |
