# Supplementary material
Source: PubMed Central journal article supplement (PMC4976228)
Supplement: Supp_Table2.pdf [file Supp_Table2.pdf]

SUPPLEMENTARY TABLE S2. QUANTITATIVE REVERSE TRANSCRIPTION REAL TIME POLYMERASE  
CHAIN REACTION PRIMERS AND PROBES IN THE SYBERGREEN AND TAQMAN METHODS

| <i>Gene</i>             | <i>Detection method</i> | <i>Direction</i> | <i>Sequence 5'-3'</i>              |
|-------------------------|-------------------------|------------------|------------------------------------|
| <i>PTCSC3</i>           | SyberGreen              | Forward          | tca aac tcc agg gct tga ac         |
|                         |                         | Reverse          | att acg gct ggg tct acc t          |
| <i>TSHR</i>             | SyberGreen              | Forward          | ccc agt acg cag act ctg aa         |
|                         |                         | Reverse          | cca gtg ttg aaa atg cca ag         |
| <i>TPO</i>              | SyberGreen              | Forward          | aca gca tca ctg gca tga ac         |
|                         |                         | Reverse          | gtg cac aaa gtc ccc att ct         |
| <i>TG</i>               | SyberGreen              | Forward          | ctg gtg tgt cat gga cag cgg aga a  |
|                         |                         | Reverse          | ccc gag att gtc tca cac agg at     |
| <i>CDH1</i>             | SyberGreen              | Forward          | gtc act gac acc aac gat aat cct    |
|                         |                         | Reverse          | ttt cag tgt ggt gat tac gac gtt a  |
| <i>S100A4</i>           | SyberGreen              | Forward          | gag ctg ccc agc ttc ttg            |
|                         |                         | Reverse          | tgc agg aca gga aga cac ag         |
| <i>FNI</i>              | SyberGreen              | Forward          | aaa ctt gca tct gga ggc aaa ccc    |
|                         |                         | Reverse          | agc tct gat cag cat gga cca ct     |
| <i>COL1A1</i>           | SyberGreen              | Forward          | tgt tca gct ttg tgg acc tcc g      |
|                         |                         | Reverse          | cgc agg tga ttg gtg gga tgt ct     |
| <i>PTCSC2-spliced</i>   | Taqman                  | Forward          | atg gtc ctt gga gct gac at         |
|                         |                         | Reverse          | ttc gaa ctg gat ata gga ca         |
|                         |                         | Probe            | tcc ctc tctt gta ggc atc cca ct    |
| <i>PTCSC2-unspliced</i> | Taqman                  | Forward          | tgg tga tgg tat ggt cat gg         |
|                         |                         | Reverse          | ccc agg ctc agg tta tgt ct         |
|                         |                         | Probe            | agg taa tga gtg gct gga atg gaa ca |
