# Supplementary material
Source: PubMed Central journal article supplement (PMC4976228)
Supplement: Supp_Table3.pdf [file Supp_Table3.pdf]

SUPPLEMENTARY TABLE S3.  $\Delta C_T$  VALUES FOR ALL THE 10 MARKERS TESTED  
IN QUANTITATIVE REVERSE TRANSCRIPTION REAL TIME POLYMERASE CHAIN REACTION

| <i>Gene name</i>        | <i>Day 8</i> | <i>Day 21</i> | <i>Day 43</i> | <i>Normal tissue</i> | <i>Tumor tissue</i> | <i>BCPAP</i> | <i>KTC1</i>  |
|-------------------------|--------------|---------------|---------------|----------------------|---------------------|--------------|--------------|
| <i>PTCSC2-spliced</i>   | 13.51±0.92   | 16.57±1.14    | 16.43±0.32    | 10.10±0.04           | 11.69±0.10          | Undetectable | 15.95±1.01   |
| <i>PTCSC2-unspliced</i> | 8.36±1.44    | 10.79±0.36    | 11.00±0.36    | 2.29±0.27            | 3.38±0.14           | 15.39±0.67   | 10.05±0.29   |
| <i>PTCSC3</i>           | 13.62±1.36   | 15.60±1.47    | 10.96±0.04    | 5.93±0.10            | 8.48±0.43           | 15.59±0.33   | 20.09±0.99   |
| <i>TSHR</i>             | 8.45±0.27    | 13.31±1.48    | 11.13±0.25    | 2.49±0.18            | 2.64±0.32           | 17.18±0.31   | Undetectable |
| <i>TPO</i>              | 6.76±1.14    | 11.13±2.36    | 9.94±0.17     | 1.56±0.20            | 5.12±0.32           | Undetectable | 19.38±2.85   |
| <i>TG</i>               | 6.97±0.76    | 11.56±0.94    | 12.13±0.57    | -1.65±0.33           | -0.15±0.21          | 19.70±0.27   | 13.19±0.29   |
| <i>CDH1</i>             | 4.36±1.63    | 4.69±0.34     | 8.79±2.07     | -0.18±0.55           | 0.98±0.61           | 18.46±0.44   | 19.80±0.94   |
| <i>SI00A4</i>           | 5.04±0.84    | 6.54±0.79     | 6.83±0.51     | 2.72±0.95            | 1.34±0.72           | 7.11±0.21    | 5.79±0.20    |
| <i>FNI</i>              | 2.75±1.49    | 1.15±0.33     | -0.41±0.77    | 4.85±2.63            | -1.68±1.45          | 1.12±0.09    | -2.15±0.11   |
| <i>COL1A1</i>           | 5.05±2.15    | -0.33±1.34    | -1.05±1.28    | 3.34±0.90            | -1.20±1.54          | 7.30±0.25    | -0.28±0.32   |

Data were shown as mean ± standard variation, and all the measurements were made from three to five repeated experiments.
